# Supplementary material for: Porous SnO2–Fe2O3nanocubes with improved electrochemical performance for lithium ion batteries
Source: Royal Society of Chemistry journal article supplement (doi:10.1039/c4dt02028f), 2014-10-03
Supplement: c4dt02028f1.pdf [file c4dt02028f1.pdf]

Electronic Supplementary Information (ESI) for

**Porous SnO<sub>2</sub>-Fe<sub>2</sub>O<sub>3</sub> nanocubes with improved electrochemical performance for lithium ion batteries**

**Yuan Yan,<sup>a</sup> Feihu Du,<sup>b</sup> Xiaoping Shen,<sup>a,\*</sup> Zhenyuan Ji,<sup>a</sup> Hu Zhou,<sup>c</sup> and Guoxing Zhu<sup>a</sup>**

<sup>a</sup> School of Chemistry and Chemical Engineering, Jiangsu University, Zhenjiang 212013, P. R. China

<sup>b</sup> School of Chemistry and Chemical Engineering, Shanghai Jiao Tong University, Shanghai 200240, P. R. China.

<sup>c</sup> School of Material Science and Engineering, Jiangsu University of Science and Technology, Zhenjiang 212003, P. R. China

\*Corresponding author. E-mail: xiaopingshen@163.com

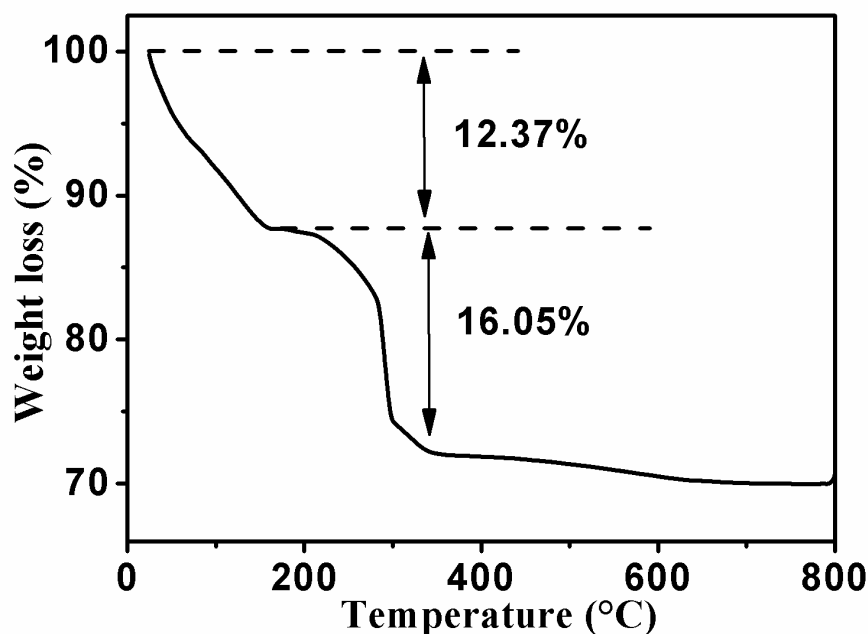

**Fig. S1** TG profile of nanocubic Sn<sub>3</sub>[Fe(CN)<sub>6</sub>]<sub>4</sub> precursor.

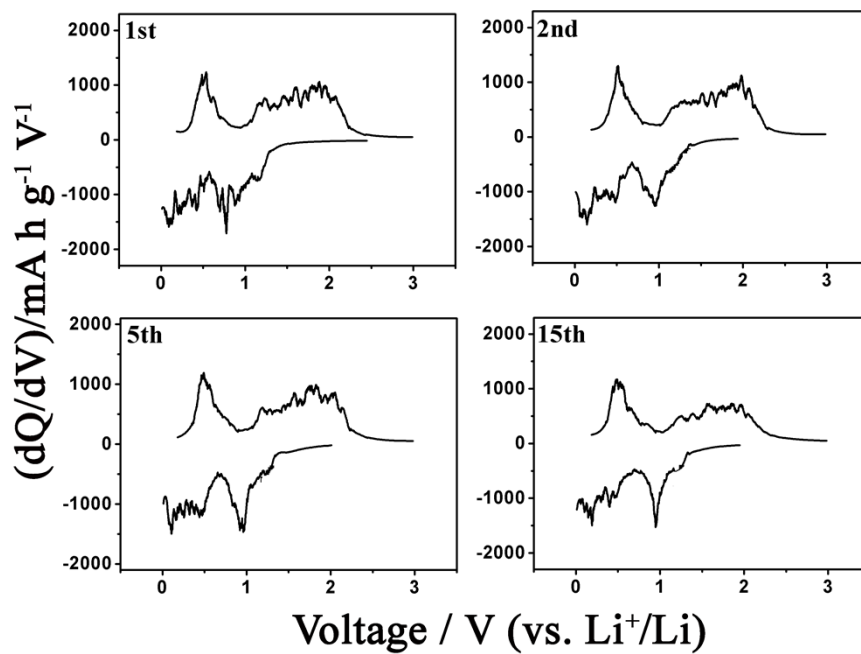

**Fig. S2** The differential capacity vs voltage of  $\text{SnO}_2\text{-Fe}_2\text{O}_3$  cell cycled at  $200 \text{ mA g}^{-1}$ .

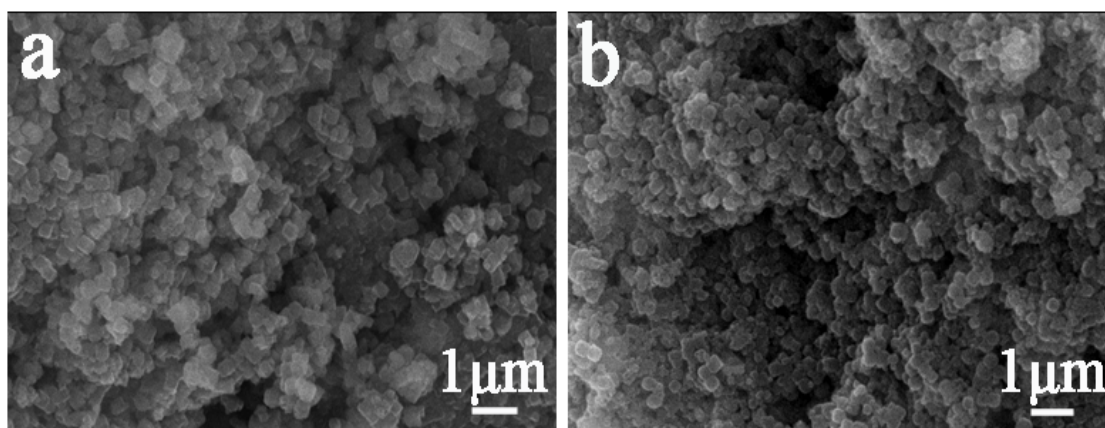

**Fig. S3** SEM images of the precursor  $\text{Sn}_3[\text{Fe}(\text{CN})_6]_4$  obtained under different solvothermal temperatures: (a)  $120 \text{ }^\circ\text{C}$  and (b)  $180 \text{ }^\circ\text{C}$ .

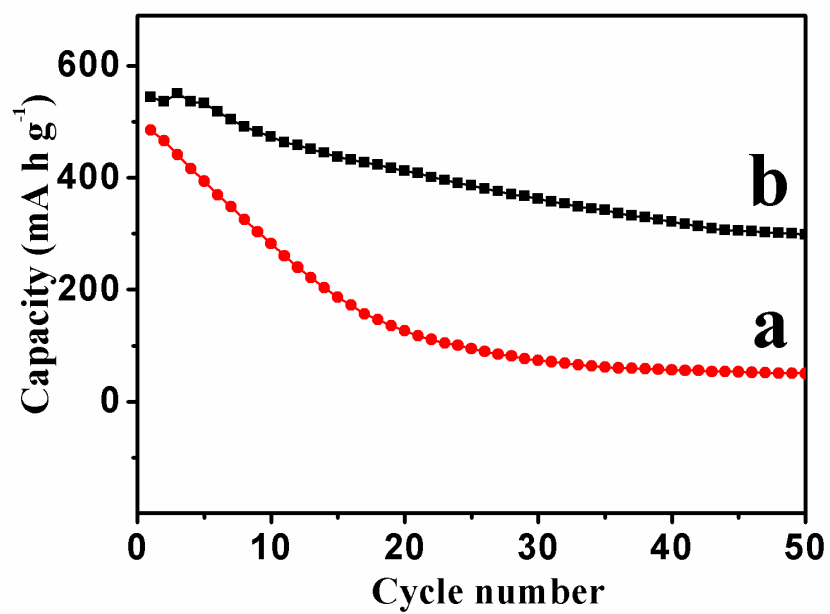

**Fig. S4** Cycling performance of SnO<sub>2</sub>-Fe<sub>2</sub>O<sub>3</sub> samples with Sn/Fe mole ratios of 7.26 (a) and 1.53 (b) at the current density of 2000 mA g<sup>-1</sup>.
